# Supplementary material for: Novel roles for the radial spoke head protein 9 in neural and neurosensory cilia
Source: PubMed Central journal article supplement (PMC5043386; doi:10.1038/srep34437), 2016-09-30
Supplement: srep34437-s10.pdf [file srep34437-s10.pdf]

## Supplementary Information

### Novel roles for the radial spoke head protein 9 in neural and neurosensory cilia.

Irina Sedykh<sup>1,2</sup>, Jessica J. TeSlaa<sup>1,2,3,6</sup>, Rose L. Tatarsky<sup>1,2</sup>, Abigail N. Keller<sup>1,2,7</sup>,  
Kimberly A. Toops<sup>4,5</sup>, Aparna Lakkaraju<sup>4,5</sup>, Molly K. Nyholm<sup>1,2,8</sup>, Marc A. Wolman<sup>1</sup>,  
Yevgenya Grinblat<sup>1,2,5</sup> \*

<sup>1</sup> Department of Zoology, University of Wisconsin, Madison, WI, 53706, USA

<sup>2</sup> Department of Neuroscience, University of Wisconsin, Madison, WI, 53706, USA

<sup>3</sup> Cellular and Molecular Biology Training Program, University of Wisconsin, Madison, WI,  
53706, USA

<sup>4</sup> Department of Ophthalmology and Visual Sciences, University of Wisconsin-Madison,  
Madison, WI 53706

<sup>5</sup> McPherson Eye Research Institute, University of Wisconsin, Madison, WI, 53706, USA

<sup>6</sup> Current address: Wisconsin Institute for Science Education and Community Engagement,  
University of Wisconsin, Madison, WI, 53706, USA

<sup>7</sup> Current address: Molecular and Cellular Biology Program and Department of Genome  
Sciences, University of Washington, Seattle, WA 98195-5065

<sup>8</sup> Current address: Promega Corporation, 2800 Woods Hollow Road, Madison, WI 53711

\* Correspondence to [ygrinblat@wisc.edu](mailto:ygrinblat@wisc.edu)

**Supplementary Figure 1. Single antibody controls for rsph9/ ace-tubulin immunostaining (controls for bleed-through)**

Wild type embryos were stained with an acetylated  $\alpha$ -tubulin (A) or anti-Rsph9 antibody (B). Embryos were then incubated with DAPI (cyan) to label nuclei.

A-A'': pronephric duct in embryo stained for  $\alpha$ -tubulin only. Note absence of ciliary staining on the 568 channel when overexposed.

B-B'': Pronephric duct in embryo stained for Rsph9 only. Note absence of ciliary staining on the 488 channel, when overexposed.

**Supplementary Figure 2. Western blot analysis of Rsph9 antibody reactivity.**

A: Protein alignment shows strong conservation between zebrafish, human and mouse Rsph9 orthologs (predicted MW 30.9 kD). Asterisk marks position of frame shift caused by mutations in  $rsph9^{uw208}$  and  $rsph9^{uw212}$ . B, C: Western blots of whole-embryo lysates from 4-5-dpf embryos, stained with anti-Rsph9 antibody. B: lysates from a group of  $rsph9^{208/208}$  and  $rsph9^{208/+}$  siblings (lane 1) and wild type (lane 2) siblings contain several bands that cross-react with the antibody. Only one band migrates at the predicted ~31 kD size of rsph9 protein. Note reduced intensity of the band in heterozygous/homozygous embryos. C: lysates from  $rsph9^{208/208}$  (lane 1) and  $rsph9^{208/+}$  (lane 2) siblings. The ~ 31 kD band is absent in  $rsph9^{208}/rsph9^{208}$  embryos, while the higher bands are independent of the rsph9 genotype. Asterisk marks the predicted position of zebrafish Rsph9 protein. MW=PrecisionPlus Protein standards, BioRad.

**Supplementary Figure 3. Rsph9 genotyping assay.**

DNA was extracted from immunostained 1dpf embryos after confocal imaging (A), or 4dpf larvae (B). Rsph9 CRISPR site was PCR-amplified and analyzed on a 3.5% Metaphor gel. A:  $rsph9^{uw208}$  genotyping results. B:  $rsph9^{uw212}$  genotyping results. PCR products were digested with MbolI prior to electrophoresis.

**Supplementary Figure 4. Morpholino designed against the translation start site of Rsph9 blocks translation from exogenous Rsph9 RNA.**

A-D: Wild-type embryos injected with different combinations of rsph9 MO and rsph9-tRFP mRNA. A: Injection of rsph9-tRFP mRNA alone results in tRFP fluorescence at varying levels between embryos. B: Co-injection of rsph9MO with tRFP mRNA does not prevent tRFP fluorescence. C,D: Co-injection of rsph9MO with rsph9-tRFP mRNA, which contains the binding site of the rsph9MO, prevents expression of rsph9-tRFP, as indicated by absence of RFP fluorescence.

**Supplementary Figure 5. Morpholino knockdown of Rsph9 causes structural axonemal defects.**

A-H: TEM images of ciliary cross-sections in rsph9 morphant embryos at 1 dpf. Ventral neural cilia with 9+0 axonemes found in the ventral midbrain (A) and spinal cord (B) of uninjected control embryos. Note outer dynein arms (arrow), indicative of ciliary motility. Rsph9-depleted morphants contain aberrant 8+1 cilia in the ventral midbrain (C, D). Pronephric cilia in uninjected controls have 9+2 axonemes (E). Rsph9 morphants contain a mixture of cilia with 9+2 (F), supernumerary central microtubules, e.g. 9+5 (G) and 9+0 (H). I: Summary of TEM analysis of ciliary axonemes in wildtype, control morpholino-injected, and Rsph9 morpholino-injected embryos.

**Supplementary Figure 6. Dorsal cilia are uniform across brain subdivisions and throughout neurulation.** Fixed *Tg( $\beta$ -actin:mGFP)* embryos stained with antibodies against acetylated  $\alpha$ -tubulin (green), gamma-tubulin (blue) and GFP (red). (A,B) Cilia in the dorsal FB do not change in length over time. (C) Average length of dorsal FB cilia at 12S (1.36 $\mu$ m), and 24S (1.02 $\mu$ m). (D,E) Dorsal MB cilia remain unchanged over time. (F) Averaged length at 12S (1.53 $\mu$ m) and 24S (1.54 $\mu$ m). (G,H) Dorsal HB cilia remain

unchanged over time. (I) Averaged length at 12S (0.98 $\mu\text{m}$ ) and 24S (1.07 $\mu\text{m}$ ). Cilia length was measured in Image J (NIH). Averages were compiled from 20 cilia picked from 10 $\mu\text{m}$  stacks of the dorsal- and ventral-most regions of the neural tube.

A-B, D-E, G-H are stacked confocal images with anterior to the left. Error bars represent standard error of the mean.

**Supplementary Figure 7. Distinct subpopulations of ventral cilia in each brain subdivision increase in length during neurulation.** *Tg( $\beta$ -actin:mGFP)* embryos

stained with antibodies against acetylated  $\alpha$ -tubulin (green), gamma-tubulin (blue) and GFP (red), except in A, where nuclei are stained red. (A-C) Cilia in the ventral FB do not change in length over time. (D) Average length of ventral FB cilia at 12S (1.36 $\mu\text{m}$ ), 18S (1.87 $\mu\text{m}$ ) and 24S (1.69 $\mu\text{m}$ ). (E-G) Ventral MB cilia are longer than primary cilia on average and increase in length over time. (H) Average length at 12S (2.76 $\mu\text{m}$ ), 18S (4 $\mu\text{m}$ ) and 24S (5.77 $\mu\text{m}$ ). (I-K) Ventral HB cilia are longer than MB cilia at 12S and increase in length over time. (L) Average length at 12S (3.72 $\mu\text{m}$ ), 18S (5.02 $\mu\text{m}$ ) and 24S (5.01 $\mu\text{m}$ ). A-C, E-G, I-K are stacked confocal images with anterior to the left. Error bars represent standard error of the mean.

**Supplementary Figure 8. Rsph9 immunoreactivity co-localizes with acetylated tubulin in hair cell kinocilia.**

Wildtype embryos at 3 dpf were immunostained for acetylated tubulin (yellow) and rsph9 (magenta). A-A'': crista hair cells with kinocilia labeled by acetylated tubulin and rsph9. B-B'': macula hair cells with kinocilia labeled by acetylated tubulin and rsph9.

**Supplementary Figure 9. Rsph9 function is not required for kinocilia formation or hair cell mechanotransduction.**

rsph9<sup>208</sup>/+ (A,C) and in rsph9<sup>208</sup>/rsph9<sup>208</sup> (B,D) sibling embryos at 3 dpf were immunostained for acetylated tubulin to label kinocilia. A, B: kinocilia of the inner ear lateral crista hair cells. C, D: kinocilia in the lateral line neuromasts.

E, F: larvae were derived from a cross between rsph9<sup>208</sup>/rsph9<sup>208</sup> females and rsph9<sup>208</sup>/+ males and treated with FM1-43 vital dye at 6 dpf. E (higher magnification in E'): a representative FM1-43 treated rsph9<sup>208</sup>/+ larva. F (higher magnification in F'): a representative FM1-43 treated rsph9<sup>208</sup>/rsph9<sup>208</sup> larva.

Supplementary Figure 1:

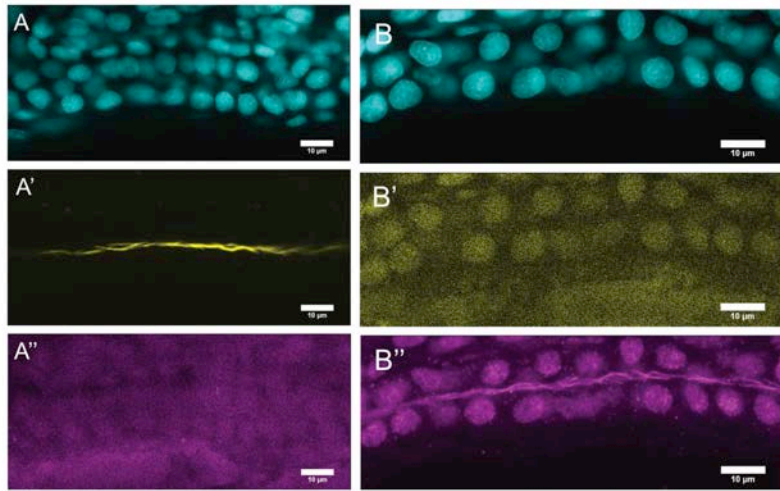

Supplementary Figure 2:

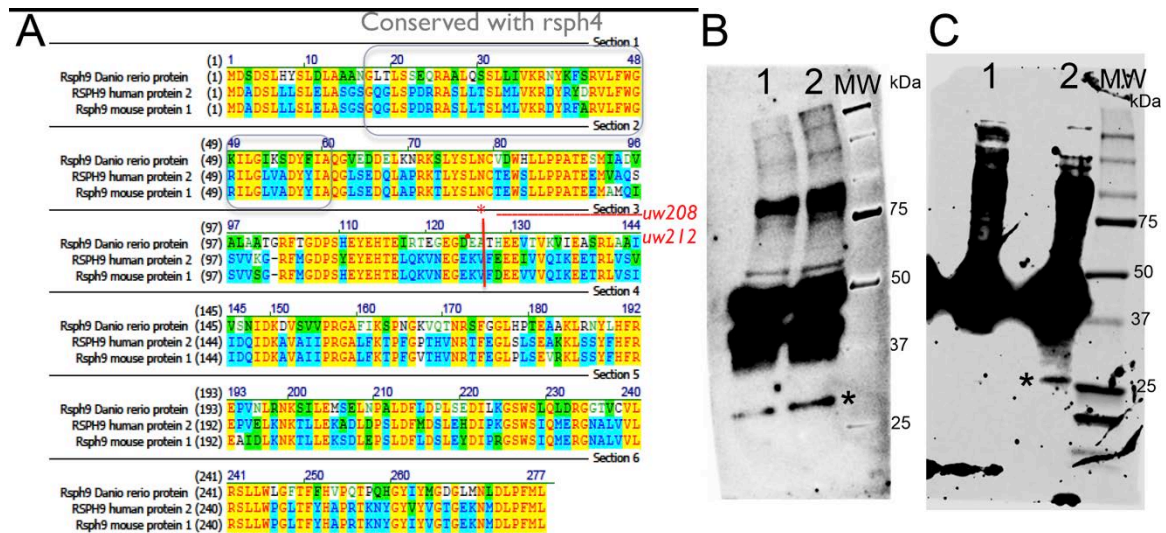

Supplementary Figure 3:

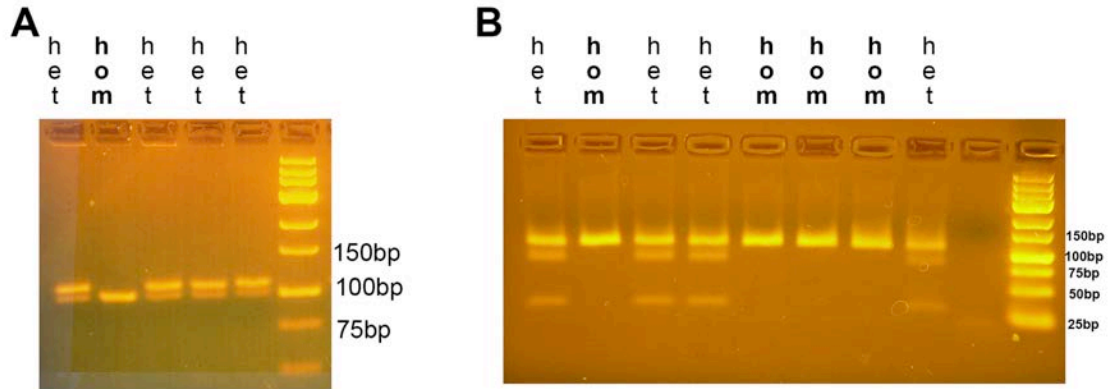

Supplementary Figure 4:

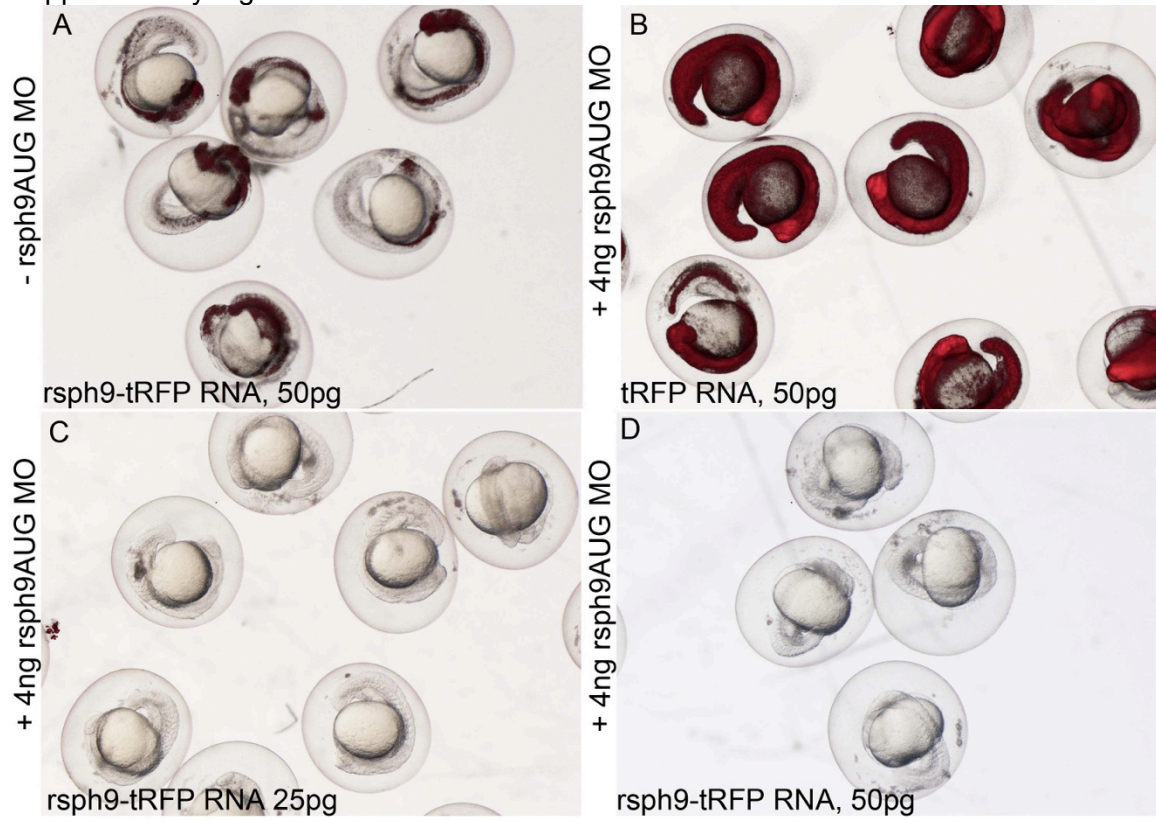



Supplementary Figure 5:

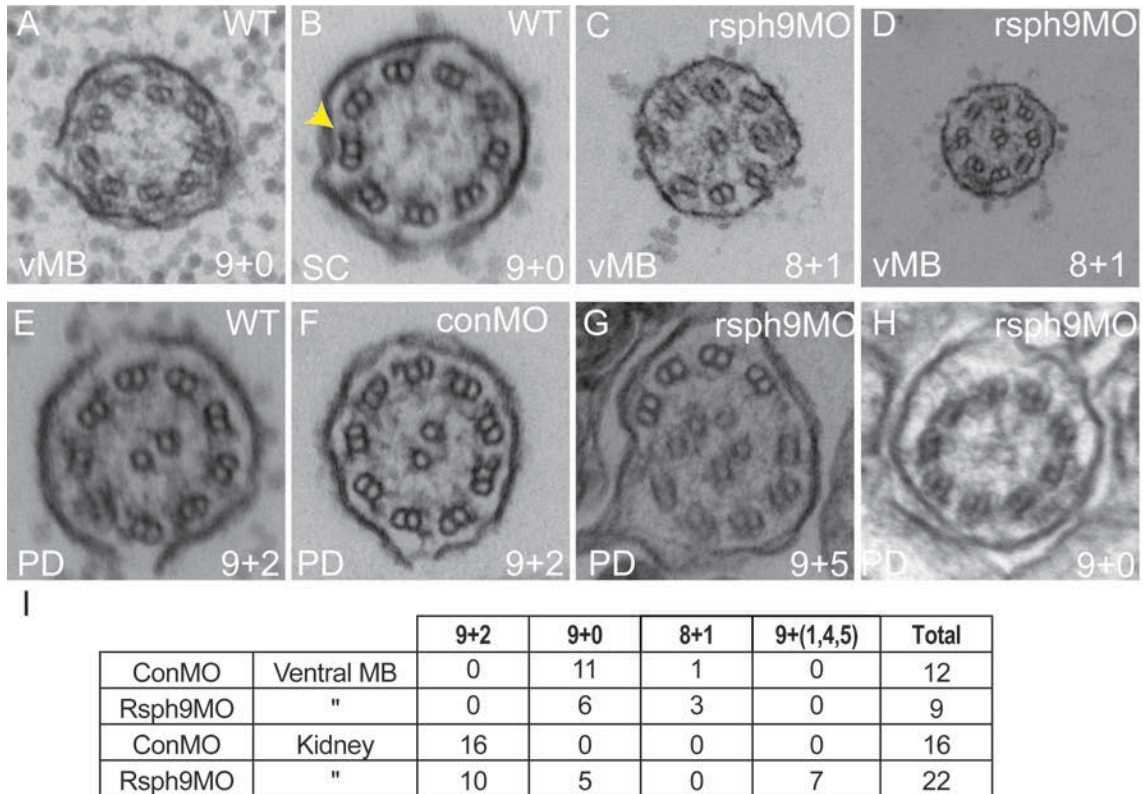

Supplementary Figure 6:

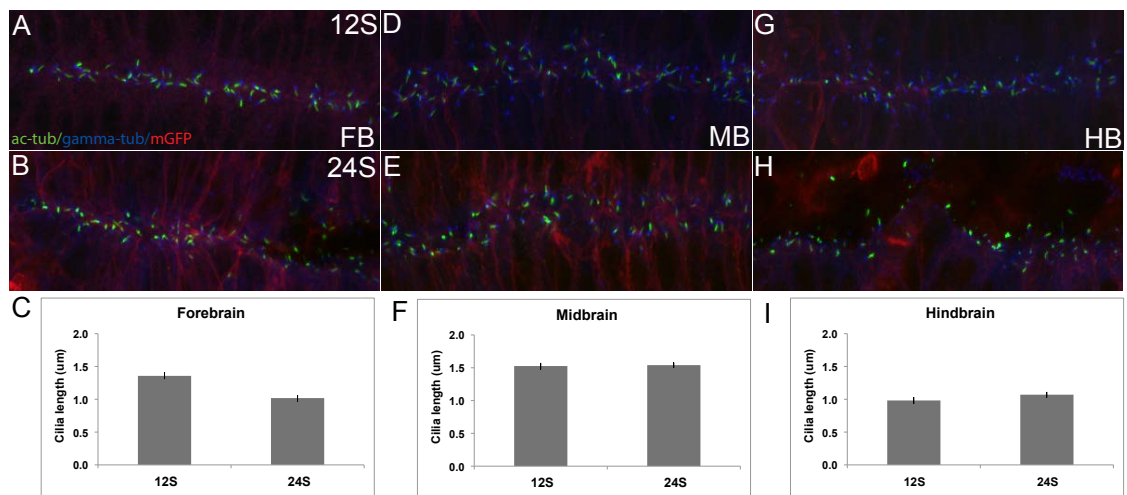

Supplementary Figure 7:

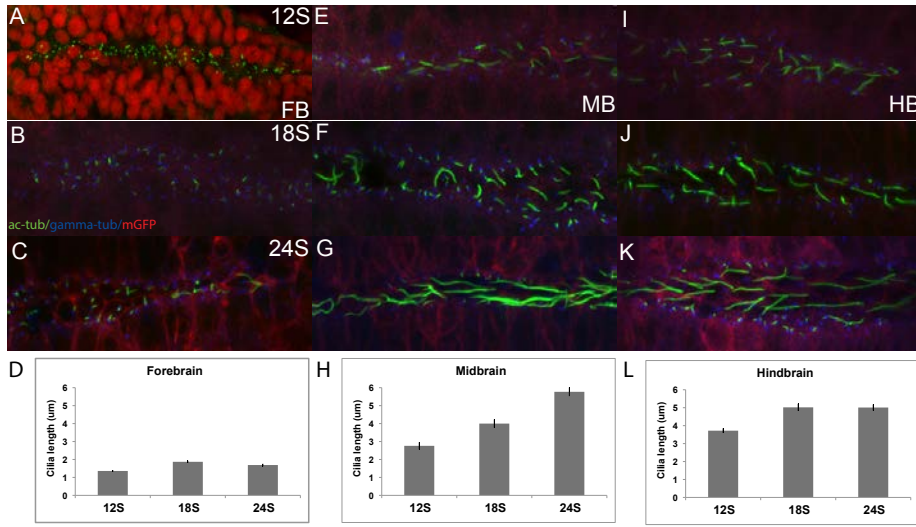

Supplementary Figure 8:

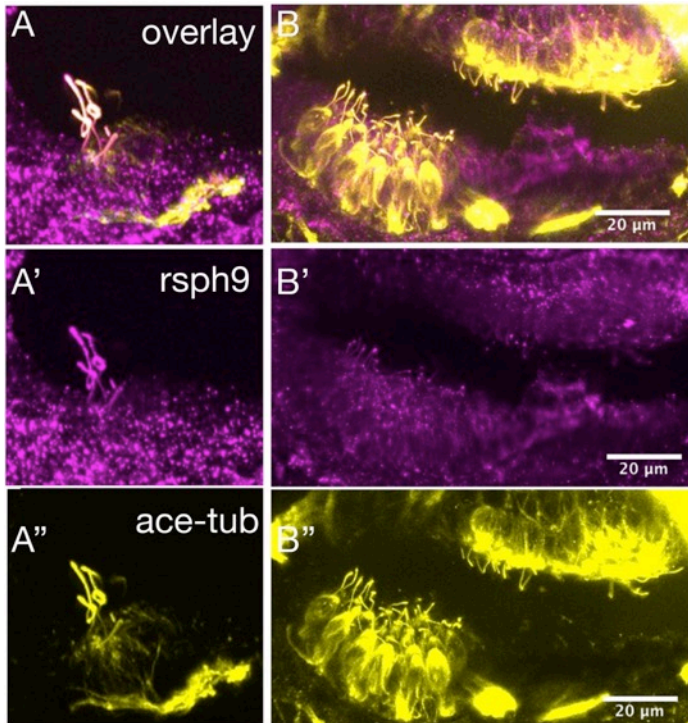



Supplementary Figure 9:

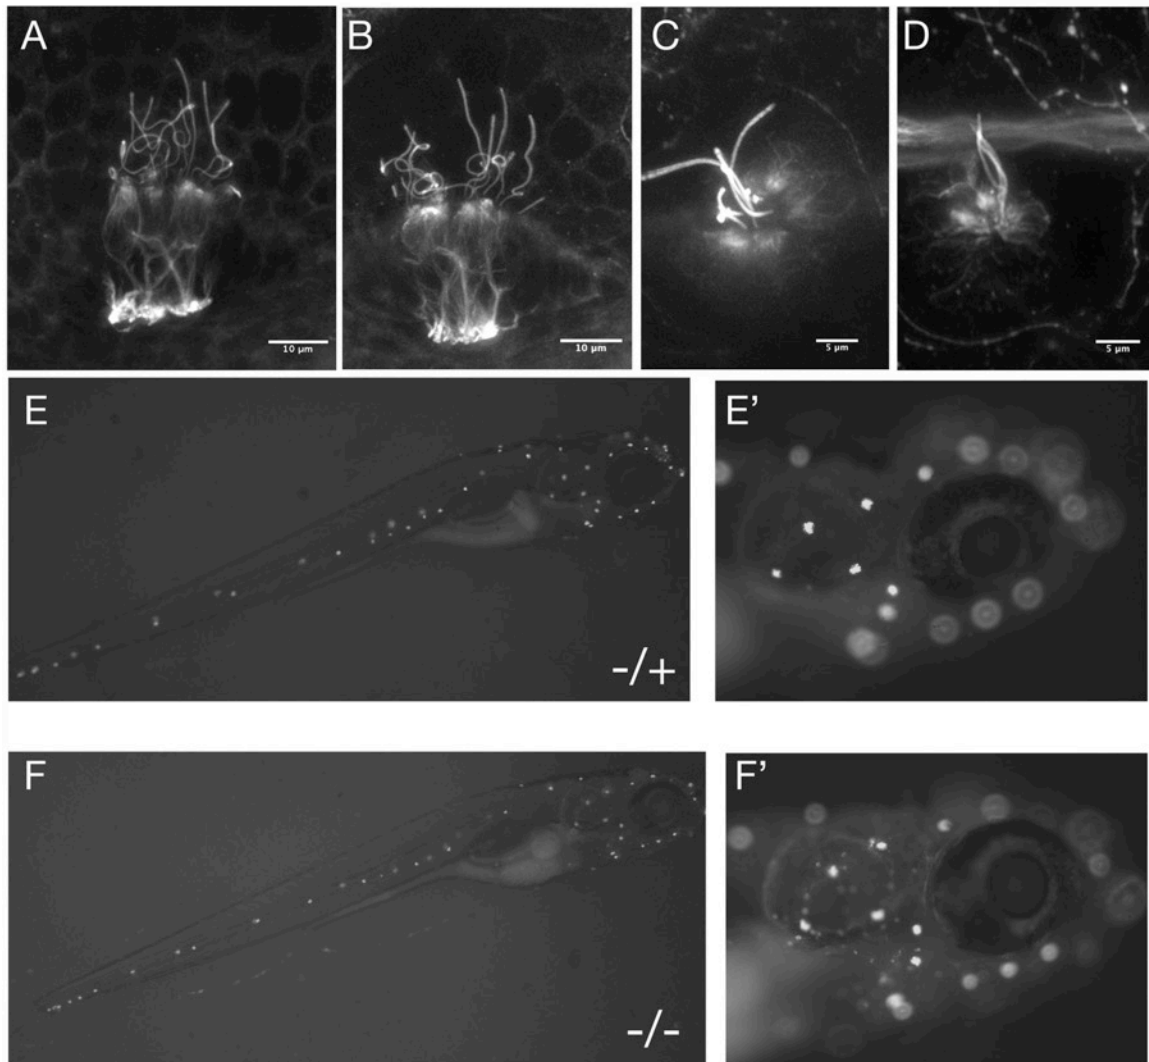

**Table 1.** Summary of scoring results and larval genotypes for *in vivo* imaging of olfactory cilia.

| 8-7-15 4dpf F1s from rsph9 <sup>208</sup> hom females x het males |            |          |                               |
|-------------------------------------------------------------------|------------|----------|-------------------------------|
| Embryo #                                                          | Movie File | Genotype | Vigorous coordinated motility |
| 1                                                                 | IMG_0105   | het      | +                             |
| 2                                                                 | IMG_0106   | het      | +                             |
| 3                                                                 | IMG_0107   | het      | +                             |
| 4                                                                 | IMG_0108   | homoz    | -                             |
| 5                                                                 | IMG_0109   | homoz    | -                             |
| 6                                                                 | IMG_0110   | het      | +                             |
| 7                                                                 | IMG_0111   | het      | +                             |
| 8                                                                 | IMG_0113   | homoz    | -                             |
| 9                                                                 | IMG_0114   | het      | +                             |

| 8-10-15 4dpf F1s from rsph9 <sup>208</sup> het females x hom males |            |          |                               |
|--------------------------------------------------------------------|------------|----------|-------------------------------|
| Embryo #                                                           | Movie File | Genotype | Vigorous coordinated motility |
| 1                                                                  | IMG_0143   | het      | +                             |
| 2                                                                  | IMG_0144   | homoz    | -                             |
| 3                                                                  | IMG_0145   | homoz    | -                             |
| 4                                                                  | IMG_0146   | homoz    | -                             |
| 5                                                                  | IMG_0147   | homoz    | +                             |
| 6                                                                  | IMG_0148   | het      | +                             |
| 7                                                                  | IMG_0149   | het      | +                             |
| 8                                                                  | IMG_0150   | homoz    | -                             |
| 9                                                                  | IMG_0151   | het      | +                             |
| 10                                                                 | IMG_0152   | het      | +                             |

**Table 2.** Summary of scoring results for *in vivo* imaging of spinal cord cilia

**Scorer A**

| Embryo# | Cilia groups    |                   |             | Total # of scored cilia | Genotype |
|---------|-----------------|-------------------|-------------|-------------------------|----------|
|         | motile, regular | motile, irregular | vibrational |                         |          |
| 1       | 1               | 1                 | 6           | 8                       | het      |
| 2       | 11              | 10                | 3           | 24                      | het      |
| 8       | 4               | 6                 | 12          | 22                      | het      |
| 3       | 0               | 0                 | 8           | 8                       | homoz    |
| 7       | 0               | 0                 | 7           | 7                       | homoz    |

**Scorer B**

| Embryo# | Cilia groups    |                   |             | Total # of scored cilia | Genotype |
|---------|-----------------|-------------------|-------------|-------------------------|----------|
|         | motile, regular | motile, irregular | vibrational |                         |          |
| 1       | 1               | 1                 | 7           | 9                       | het      |
| 2       | 12              | 10                | 2           | 24                      | het      |
| 8       | 4               | 5                 | 13          | 22                      | het      |
| 3       | 0               | 0                 | 12          | 12                      | homoz    |
| 7       | 0               | 0                 | 7           | 7                       | homoz    |

**Table 3.** Summary of acoustic startle response initiation analysis.

| ASR<br>EXPERIMENT    | LOW STIMULUS |                |                | HIGH STIMULUS   |                 |                                |
|----------------------|--------------|----------------|----------------|-----------------|-----------------|--------------------------------|
|                      | MEA          |                |                |                 |                 |                                |
| RSPH9 <sup>208</sup> | <b>N</b>     | <b>LOW-SLC</b> | <b>LOW-LLC</b> | <b>HIGH-SLC</b> | <b>HIGH-LLC</b> | <b>N</b>                       |
|                      | WT           | 23.03214286    | 58.10357143    | 77.15           | 88.58148148     | 28                             |
|                      | HET          | 19.23714286    | 64.9           | 76.37714286     | 83.428125       | 35                             |
|                      | MUT          | 7.663636364    | 20.17272727    | 31.95454545     | 51.08181818     | 22                             |
|                      |              |                |                |                 |                 | p<0.001 for all MUT means vs W |
|                      | <b>SEM</b>   | <b>LOW-SLC</b> | <b>LOW-LLC</b> | <b>HIGH-SLC</b> | <b>HIGH-LLC</b> |                                |
|                      | wt           | 1.583796061    | 2.034610186    | 1.517995772     | 3.747989928     |                                |
|                      | het          | 1.318833729    | 1.762277939    | 1.718682009     | 3.5358847       |                                |
|                      | mut          | 1.395749934    | 1.57106258     | 3.037653409     | 3.382706812     |                                |
|                      |              |                |                |                 |                 |                                |
| RSPH9 <sup>212</sup> | <b>N</b>     | <b>LOW-SLC</b> | <b>LOW-LLC</b> | <b>HIGH-SLC</b> | <b>HIGH-LLC</b> | <b>N</b>                       |
|                      | wt           | 21.58846154    | 58.31153846    | 73.23461538     | 92.5            | 26                             |
|                      | het          | 25.07727273    | 60.41590909    | 79.61363636     | 88.935          | 44                             |
|                      | mut          | 6.842105263    | 27.9           | 25.85789474     | 49.15789474     | 19                             |
|                      |              |                |                |                 |                 | p<0.001 for all MUT means vs W |
|                      | <b>SEM</b>   | <b>LOW-SLC</b> | <b>LOW-LLC</b> | <b>HIGH-SLC</b> | <b>HIGH-LLC</b> |                                |
|                      | wt           | 2.045618357    | 2.076121977    | 3.087968613     | 2.186917624     |                                |
|                      | het          | 0.874774351    | 1.695848802    | 1.7862354       | 2.460523693     |                                |
|                      | mut          | 1.718138832    | 2.061587526    | 2.638779578     | 3.273630266     |                                |
|                      |              |                |                |                 |                 |                                |

### Supplementary Movies.

OC1-4: live imaging of olfactory cilia. See Supplementary Table 1 for details.

SC1- 5: live imaging of spinal cord cilia. Representative movies from heterozygous embryos #3 (SC1), #7 (SC2), and heterozygous siblings #2 (SC3), #1 (SC4) and #8 (SC5). See Supplementary Table 2 for details.
